# Supplementary material for: Odorant receptors can mediate axonal identity and gene choice via cAMP-independent mechanisms
Source: PubMed Central journal article supplement (PMC4967819; doi:10.1098/rsob.160018), 2016-07-27
Supplement: rsob160018supp1.pdf [file rsob160018supp1.pdf]

## **Supplemental information inventory:**

### **Supplemental Figures and Legends:**

S1 (related to Figure 1): The use of #123-Cre mice for the deletion of  $Gs\alpha$  in immature OSNs.

S2 (related to Figures 4 and 5): OSNs expressing G-protein coupling M71 mutant ORs are gradually eliminated from the epithelium and their axons are rarely observed on the bulb.

S3 (related to Figures 6 and 8): O/E2-M71-GFP mice ubiquitously express *M71*.

S4 (related to Figures 7 and 9): O/E2-M71 expression affects axonal projections of OSNs expressing endogenous ORs.

S5 (related to all Figures): Previously described mouse strains with gene-targeted OR mutations and their abbreviations that were used throughout the study.

### **Supplemental Tables:**

S1 (related to Figures 1, 5, 6, S1, and S3): List of ISH probes that were used.

S2 (related to Figures 6 and 9): List of nanostring probes that were used.

## Supplemental Figures and tables.

### Figure S1. The use of #123-Cre mice for the deletion of $Gs\alpha$ in immature OSNs.

(A) Three-colour ISH on coronal sections of PD6 MOE of #123-Cre x ROSA26(R26)-STOP-tauGFP mice. Riboprobes were used against *Cre* (red-A1,-A2), *Gap43* (green-A2) and *Omp* (blue-A2). *Cre* is expressed before the onset of *Gap43*. (B, C) Three-colour ISH on coronal sections of PD6 MOE of #123-Cre x R26-STOP-tauGFP mice with probes against bovine *tau* (red-B1, -B2, -C1, -C2), *Gap43* (green-B2, C2) and *Omp* (blue-B2,-C2). Expression of tau is only observed after removal of the loxp flanked transcriptional stop cassette of the R26-STOP-tauGFP allele, which is therefore an indicator of successful Cre recombination. Tau is expressed before the onset of *Gap43*. (D, F) Three-colour ISH on coronal sections of PD6 Gs WT (D) and Gs cKO (F) MOE with probes against *Gnas* (red-D1,-D2, -F1, -F2), *Gap43* (green-D2, -F2) and *Omp* (blue-D2, -F2). In Gs cKO mice, *Gnas* expression is clearly more basal throughout the whole epithelium, indicating that it is mostly expressed in the basal progenitors. (E, G) Three-colour ISH on coronal sections of PD6 Gs WT and Gs cKO MOE with probes against *Gnal* (red), *Gap43* (green) and *Omp* (blue). (H, I) Intrinsic GFP fluorescence observed in coronal sections of the MOB from #123-Cre x R26-STOP-tauGFP (= Gs WT) in H1 and high magnification H2 and #123-Cre x R26-STOP-tauGFP x *Gnas*-E1<sup>fl/fl</sup> (= Gs cKO) mice in I1 and high magnification I2. Intrinsic GFP reporter expression is only seen after Cre recombination. DAPI counterstain. (J) The A-P position of individual M72 (PD10, Gs WT n=8, Gs cKO n=8) and MOR23 (PD21 Gs WT n=8, Gs cKO n=8) glomeruli in Gs WT and cKO animals. (K) Higher magnification of Gs WT, Figure 1A2 (see also D2 above), *Gnas* (red), *Gap43* (green), showing that some *Gap43*<sup>+</sup> cells express *Gnas* (highlighted with arrows). (L) Lower magnification of posteriorly projecting lateral M71 glomerulus in *Golf* KO mice (PD11, scale bar: 250 $\mu$ m). The M71-GFP mutation is homozygous.

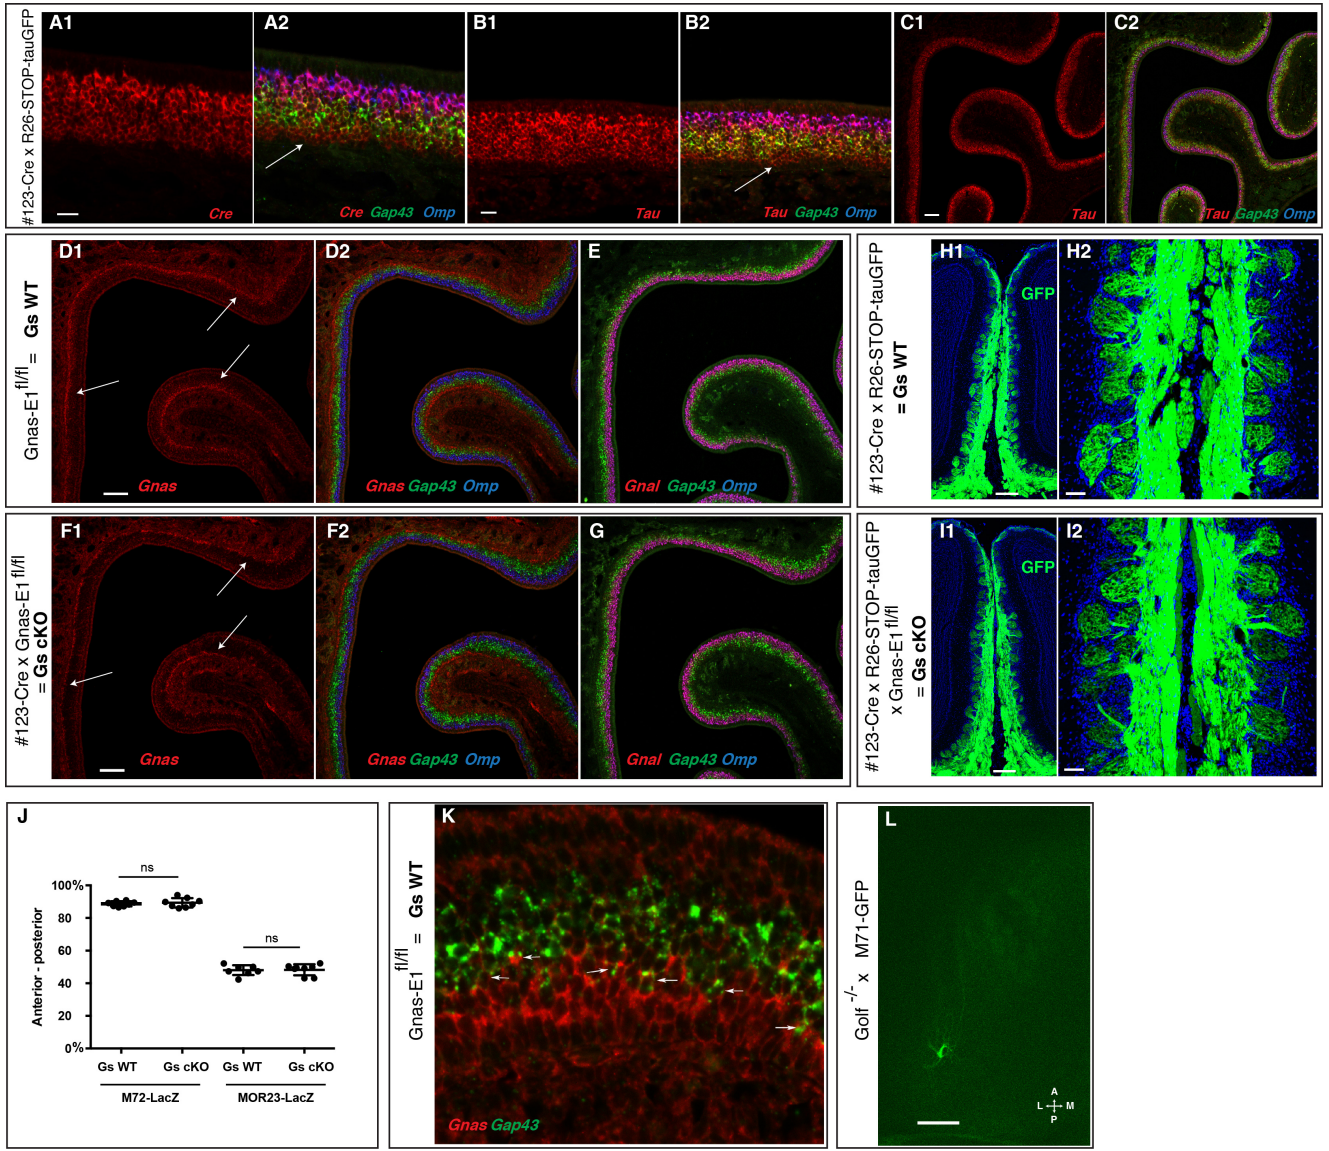

**Figure S2. OSNs expressing G-protein coupling M71 mutant ORs are gradually eliminated from the epithelium and their axons are rarely observed on the bulb.**

Medial view of X-gal-stained wholemounts of (A) M71-LacZ (3wo) and (B) M71(RDY)-lacZ (PD10) mice. (C) Higher-magnification of X-gal-stained M71(RDY) MOE (PD10), shows that OSNs poorly project axons, which appear short and stunted. (D) Number of X-gal+ OSNs on wholemounts of M71(RDY)-LacZ turbinates at indicated postnatal days (mean  $\pm$  SEM, n=6-11 for each time point). (E) IHC was performed against:  $\beta$ -galactosidase for counting M71 and M71(RDY) OSNs; GFP for counting M71(RDY)-caGs OSNs; and DsRed for counting MOR23(RDY) $\rightarrow$ M71-caGs OSNs on coronal sections at PD21. Every 10th section was collected from anterior to posterior and 49 sections were counted per mouse. Data are mean  $\pm$  SEM (n=3). One-way ANOVA and Newman-Keuls post test (D, E). \*p < 0.05, \*\*p < 0.01, \*\*\*p < 0.001. Scale bars, 500  $\mu$ m.

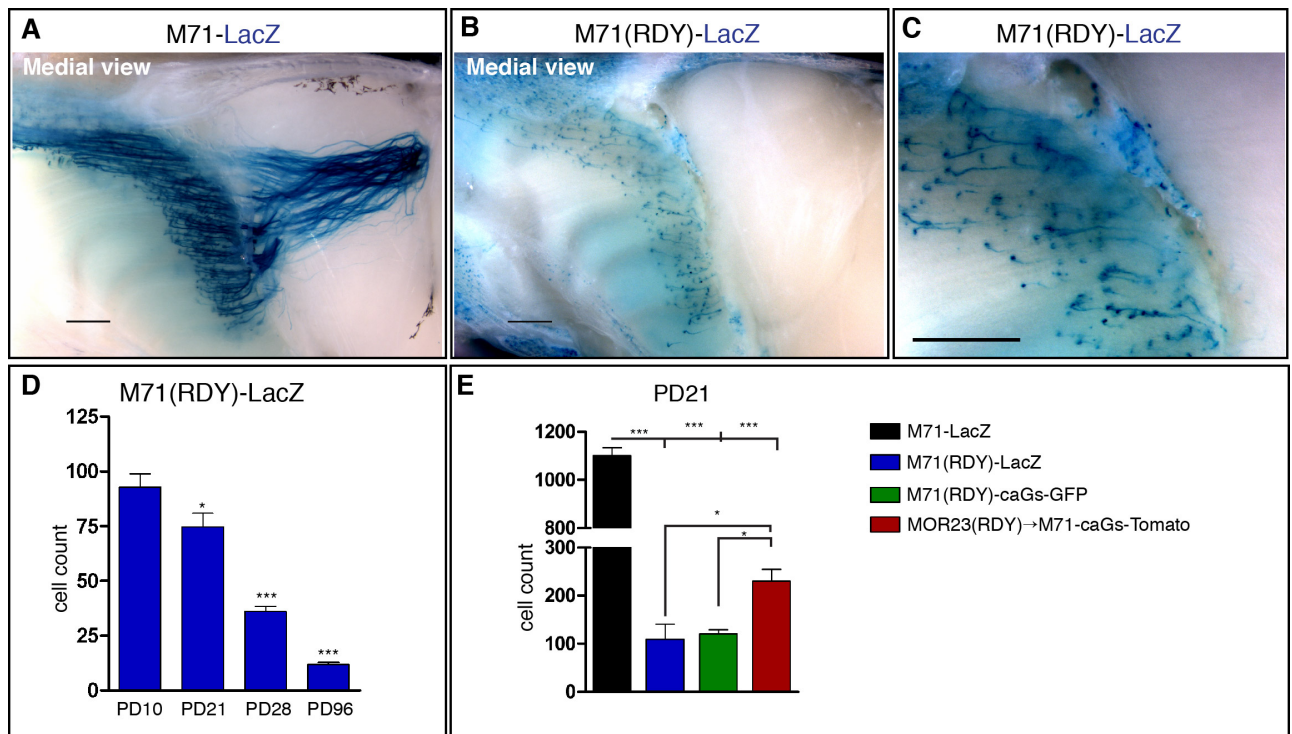

**Figure S3. O/E2-M71-GFP mice ubiquitously express M71.**

(A) Two-colour ISH on coronal sections of the MOE from WT mice with probes against *M71* (red-A1) plus *O/E2* (green-A2). (B) Three-colour ISH against *Gap43* (green), *Omp* (blue) and the sustentacular marker *Cbr2* (red), in the MOE of WT mice. (C) Two-colour ISH on coronal sections of the MOE from heterozygous O/E2-M71-GFP mice with probes against *M71* (red-C1) plus *O/E2* (green-C2). Some red labelled neurons in the dorsal epithelium appeared more intense suggesting that endogenous M71/M72 ORs are expressed at a slightly higher level than those from the O/E2 promoter. (D) Three-colour ISH against *Gap43* (green), *Omp* (blue) and the sustentacular marker *Cbr2* (red), in the MOE of heterozygous O/E2-M71-GFP mice. Scale bars, 100  $\mu\text{m}$  (A2, C2), 50  $\mu\text{m}$  (B,D).

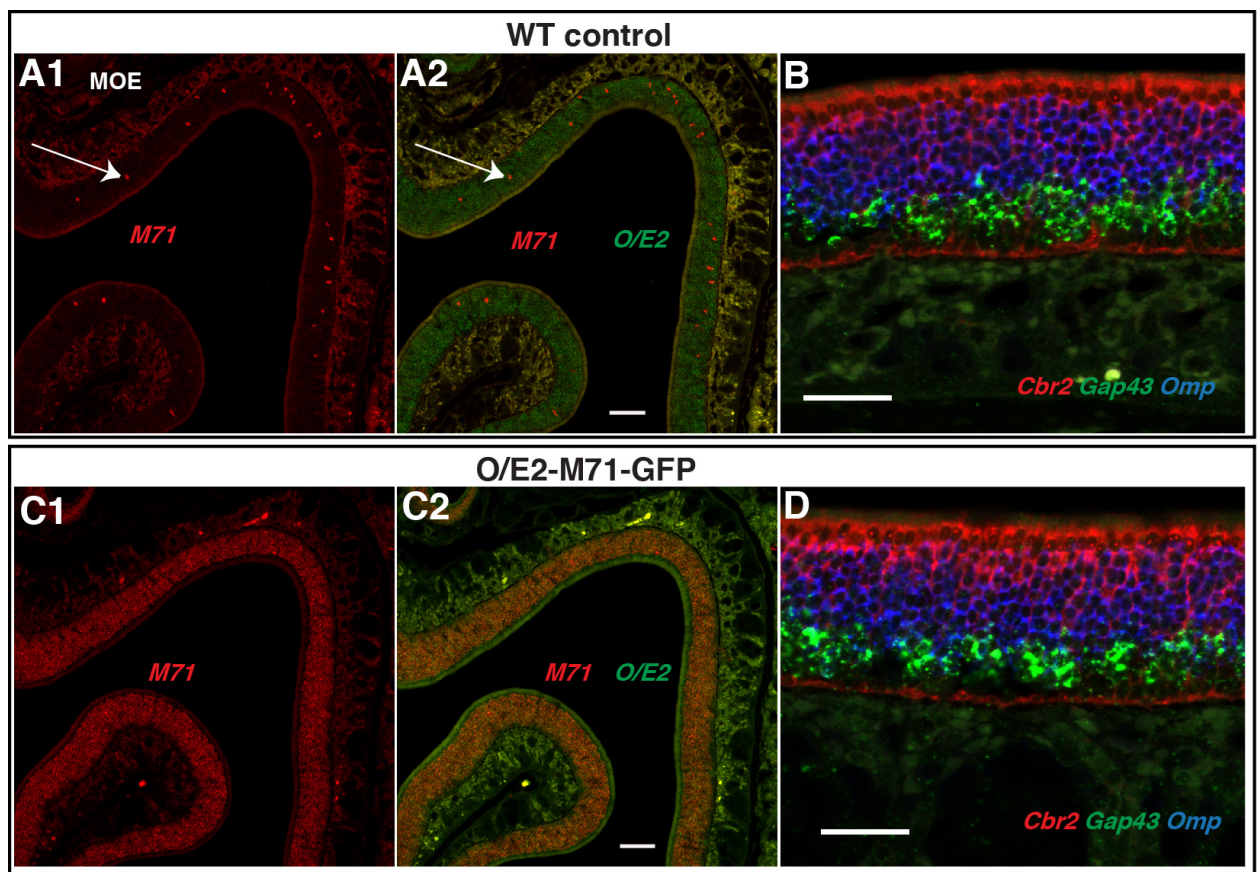



**Figure S4. O/E2-M71 expression affects axonal projections of OSNs expressing endogenous ORs.**

(A) In the P-LacZ transgenic mice, wholemount X-gal staining of the dorsal bulb labels axons expressing class II ORs, while the unlabelled butterfly-shaped pattern corresponds to the class I and TAAR domains [48]. Interestingly, in O/E2-M71-GFP mutants (right, O/E2 +/-), this butterfly pattern was disrupted, as LacZ+ axons now traversed through the dorsal-medial regions. (B-C) Wholemount X-gal staining of (B) MOR23-lacZ and (C) M71-lacZ OSNs in O/E2-M71-GFP heterozygous mice. Three representative examples are shown for two ORs, showing how O/E2-M71 expression alters the axonal projections of OSNs. Scale bars, 500  $\mu$ m.

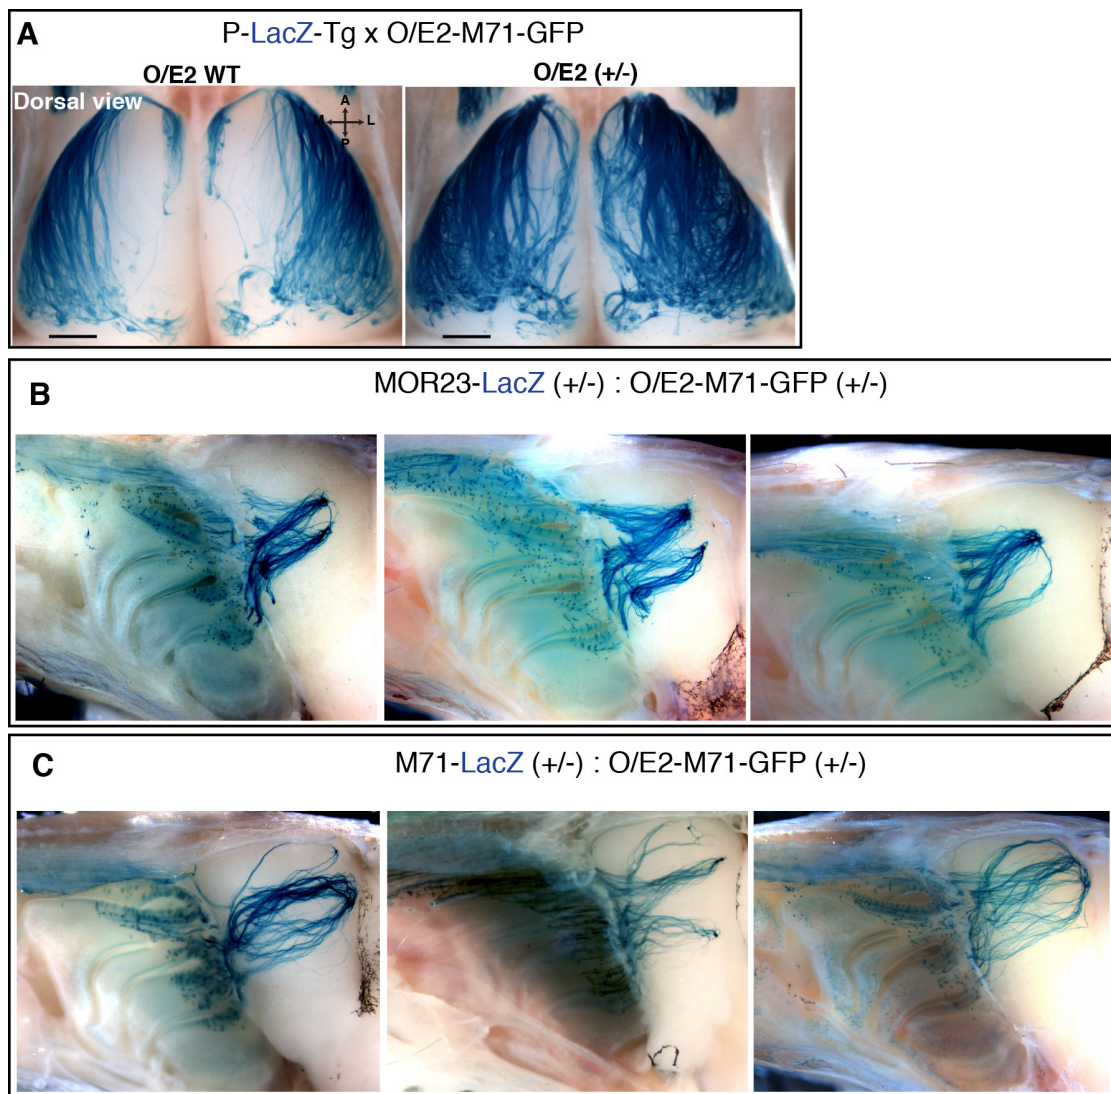

**Figure S5. Previously described mouse strains with gene-targeted OR mutations and their abbreviations that were used throughout the study.**

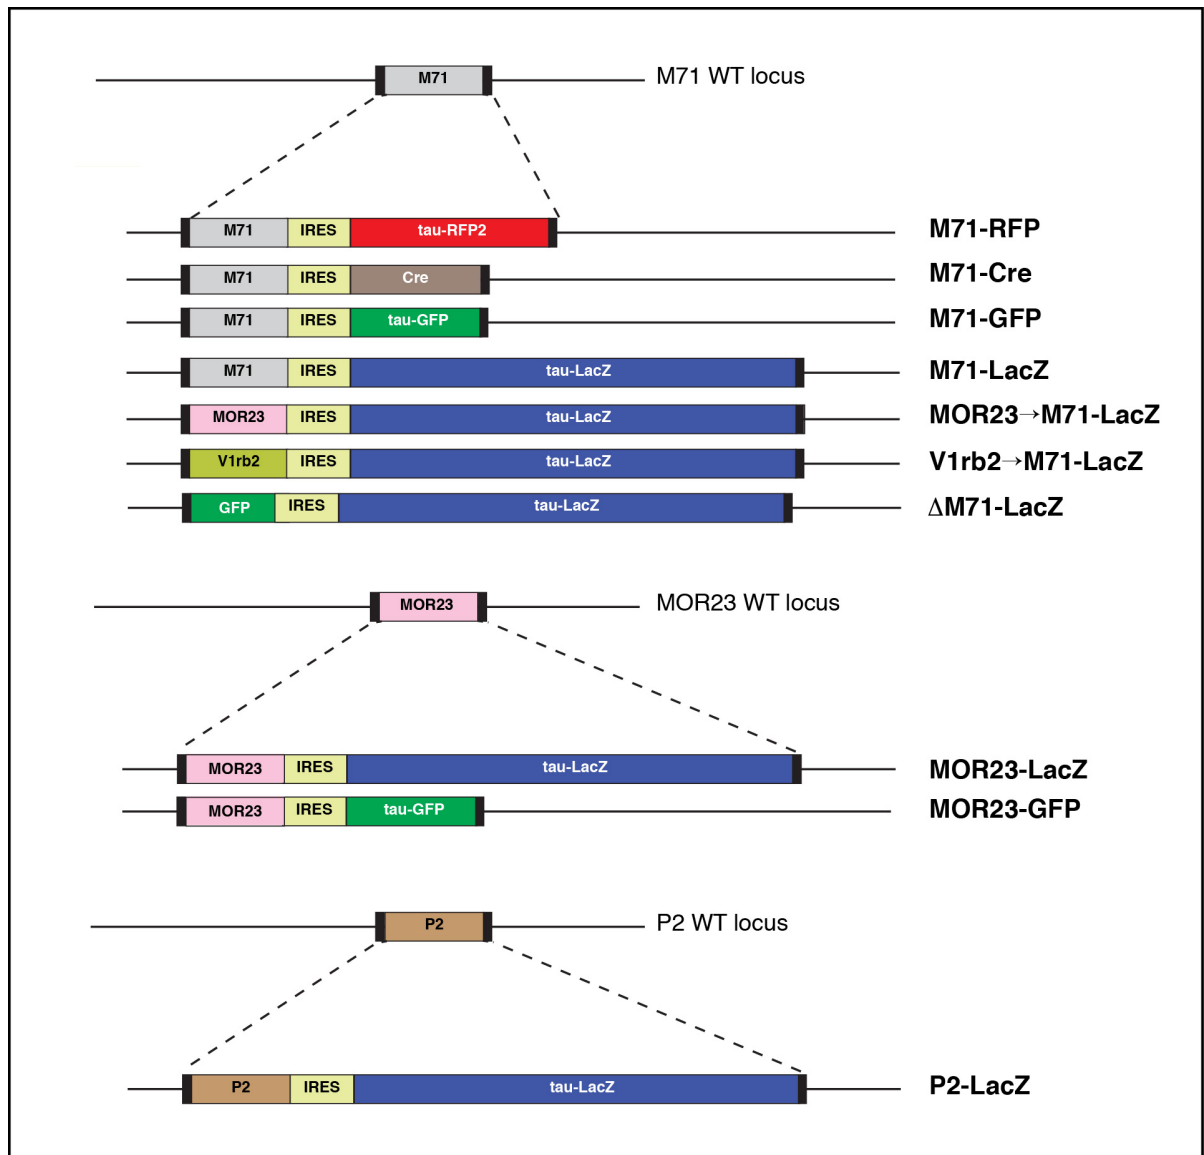

**Table S1. List of ISH Probes that were used.**

| <b>Riboprobe</b>              | <b>Sequence</b>                  | <b>Reference</b>            |
|-------------------------------|----------------------------------|-----------------------------|
| <i>Gnas</i>                   | nt 408–1512 from NM_001077510.2  | (Omura et al., 2014)        |
| <i>Gnal</i>                   | nt 1–1106 from NM_010307         | (Omura et al., 2014)        |
| <i>Omp</i>                    | nt 820-2891 from U01213          | (Ishii et al., 2004)        |
| <i>Gap43</i>                  | nt 147-860 from NM_008083        | (Ishii et al., 2004)        |
| <i>Cbr2</i>                   | nt 5-466 from BC010758           | (Ishii et al., 2004)        |
| <i>Adcy3</i>                  | nt 2853-3559 from NM_001159536   | (Hirota et al., 2007)       |
| <i>Cre</i>                    | nt 485-1516 from X03453          | (Li et al., 2004)           |
| <i>mCherry (for tdTomato)</i> | nt 21-512 from AY678264          | (Omura et al., 2014)        |
| <i>GFP</i>                    | nt 97-816 from U76561.1          | (Li et al., 2004)           |
| <i>tau</i> (bovine)           | nt 102-621 from NM_174106.2      | (Ishii and Mombaerts, 2008) |
| <i>lacZ</i>                   | nt 73035-73522 from U73857.1     |                             |
| <i>O/E2</i>                   | nt 2353-3392 from NM_001113415.1 |                             |
| <i>M71</i>                    | nt 144-1013 from NM_207664.2     | (Fuss et al., 2007)         |
| <i>Olf3 (class II mix)</i>    | nt 17-871 from NM_206903.1       | (Omura et al., 2014)        |
| <i>Olf62 (class II mix)</i>   | nt 167-883 from NM_146315.2      | (Omura et al., 2014)        |
| <i>Olf54 (class II mix)</i>   | nt 1-942 from NM_010997.1        | (Omura et al., 2014)        |
| <i>Olf749 (class II mix)</i>  | nt 73-984 from NM_020288.2       | (Fuss et al., 2007)         |



**Table S2. List of NanoString probes that were used.**

| <b>Gene</b>               | <b>Accession number</b> | <b>Target region</b> |
|---------------------------|-------------------------|----------------------|
| <i>Omp</i> (ref gene 1)   | NM_011010.2             | 1148-1247            |
| <i>Gnal</i> (ref gene 2)  | NM_177137.4             | 3129-3228            |
| <i>Adcy3</i> (ref gene 3) | NM_001159537.1          | 3377-3476            |
| <i>Ano2</i> (ref gene 4)  | NM_153589.2             | 3346-3445            |
| <i>Cnga2</i> (ref gene 5) | NM_007724.2             | 54-153               |
| <i>Olfr1015</i>           | NM_146571.2             | 761-860              |
| <i>Olfr1156</i>           | NM_146817.2             | 397-496              |
| <i>Olfr124</i>            | NM_147062.2             | 536-635              |
| <i>Olfr1301</i>           | NM_146887.1             | 351-450              |
| <i>Olfr15</i>             | NM_008762.2             | 31-130               |
| <i>Olfr1507</i>           | NM_001170918.1          | 731-830              |
| <i>Olfr1508</i>           | NM_020513.2             | 783-882              |
| <i>Olfr1509</i>           | NM_020514.2             | 371-470              |
| <i>Olfr1511</i>           | NM_146271.2             | 196-295              |
| <i>Olfr16</i>             | NM_008763.2             | 401-500              |
| <i>Olfr160</i>            | NM_030553.2             | 385-484              |
| <i>Olfr166</i>            | NM_147068.1             | 39-138               |
| <i>Olfr17</i>             | NM_020598.1             | 754-853              |
| <i>Olfr2</i>              | NM_010983.1             | 771-870              |
| <i>Olfr309</i>            | NM_001011866.1          | 401-500              |
| <i>Olfr6</i>              | NM_206897.1             | 767-866              |
| <i>Olfr713</i>            | NM_147034.1             | 837-936              |
| <i>Olfr73</i>             | NM_054090.1             | 406-505              |
| <i>Olfr78</i>             | NM_001168503.1          | 661-760              |
| <i>Kirrel2</i>            | NM_172898.3             | 2763-2862            |
| <i>Kirrel3</i>            | NM_001190914.1          | 113-212              |
| <i>Epha5</i>              | NM_007937.3             | 2006-2105            |
| <i>Efna5</i>              | NM_207654.2             | 1131-1230            |
| <i>Sema3f</i>             | NM_011349.3             | 2576-2675            |

|               |                |           |
|---------------|----------------|-----------|
| <i>Sema3a</i> | NM_009152.3    | 3116-3215 |
| <i>Nrp2</i>   | NM_001077403.1 | 611-710   |
| <i>Nrp1</i>   | NM_008737.2    | 3596-3695 |
| <i>Plxna1</i> | NM_008881.2    | 8201-8300 |
| <i>Plxna3</i> | NM_008883.2    | 6153-6252 |

---
